# Supplementary material for: Polygenic Risk Score Improves Prediction of Primary Open Angle Glaucoma Onset in the Ocular Hypertension Treatment Study
Source: bioRxiv or medRxiv preprint supplement (doi:10.1101/2023.08.15.23294141), 2023-08-16
Supplement: Supplementary file [file media-4.pdf]

#### 4. Polygenic risk score (PRS) distributions by ancestry

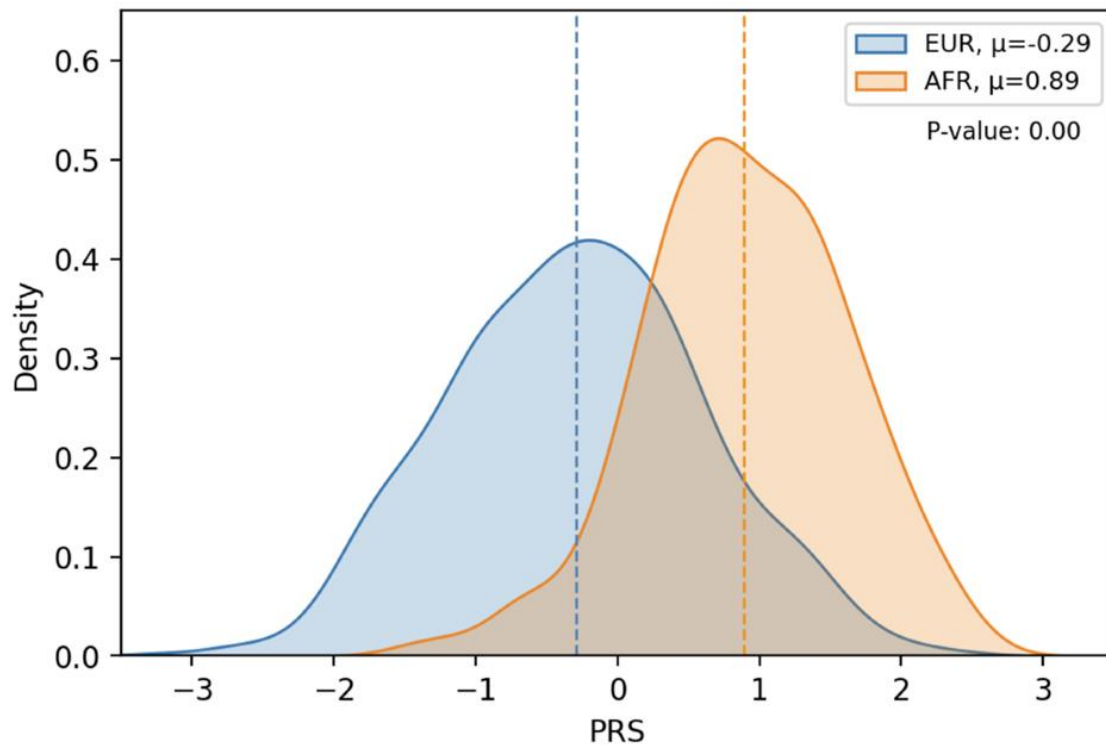

**Fig 1.** Density plot of PRS distributions by ancestry, normalized to entire population. The EUR curve represents European ancestry. The AFR curve represents African ancestry.
